# Supplementary material for: Novel MicroRNAs Differentially Expressed during Aging in the Mouse Brain
Source: PubMed Central journal article supplement (PMC3402511; doi:10.1371/journal.pone.0040028), 2012-07-23

Figure S1

INSULIN SIGNALING PATHWAY

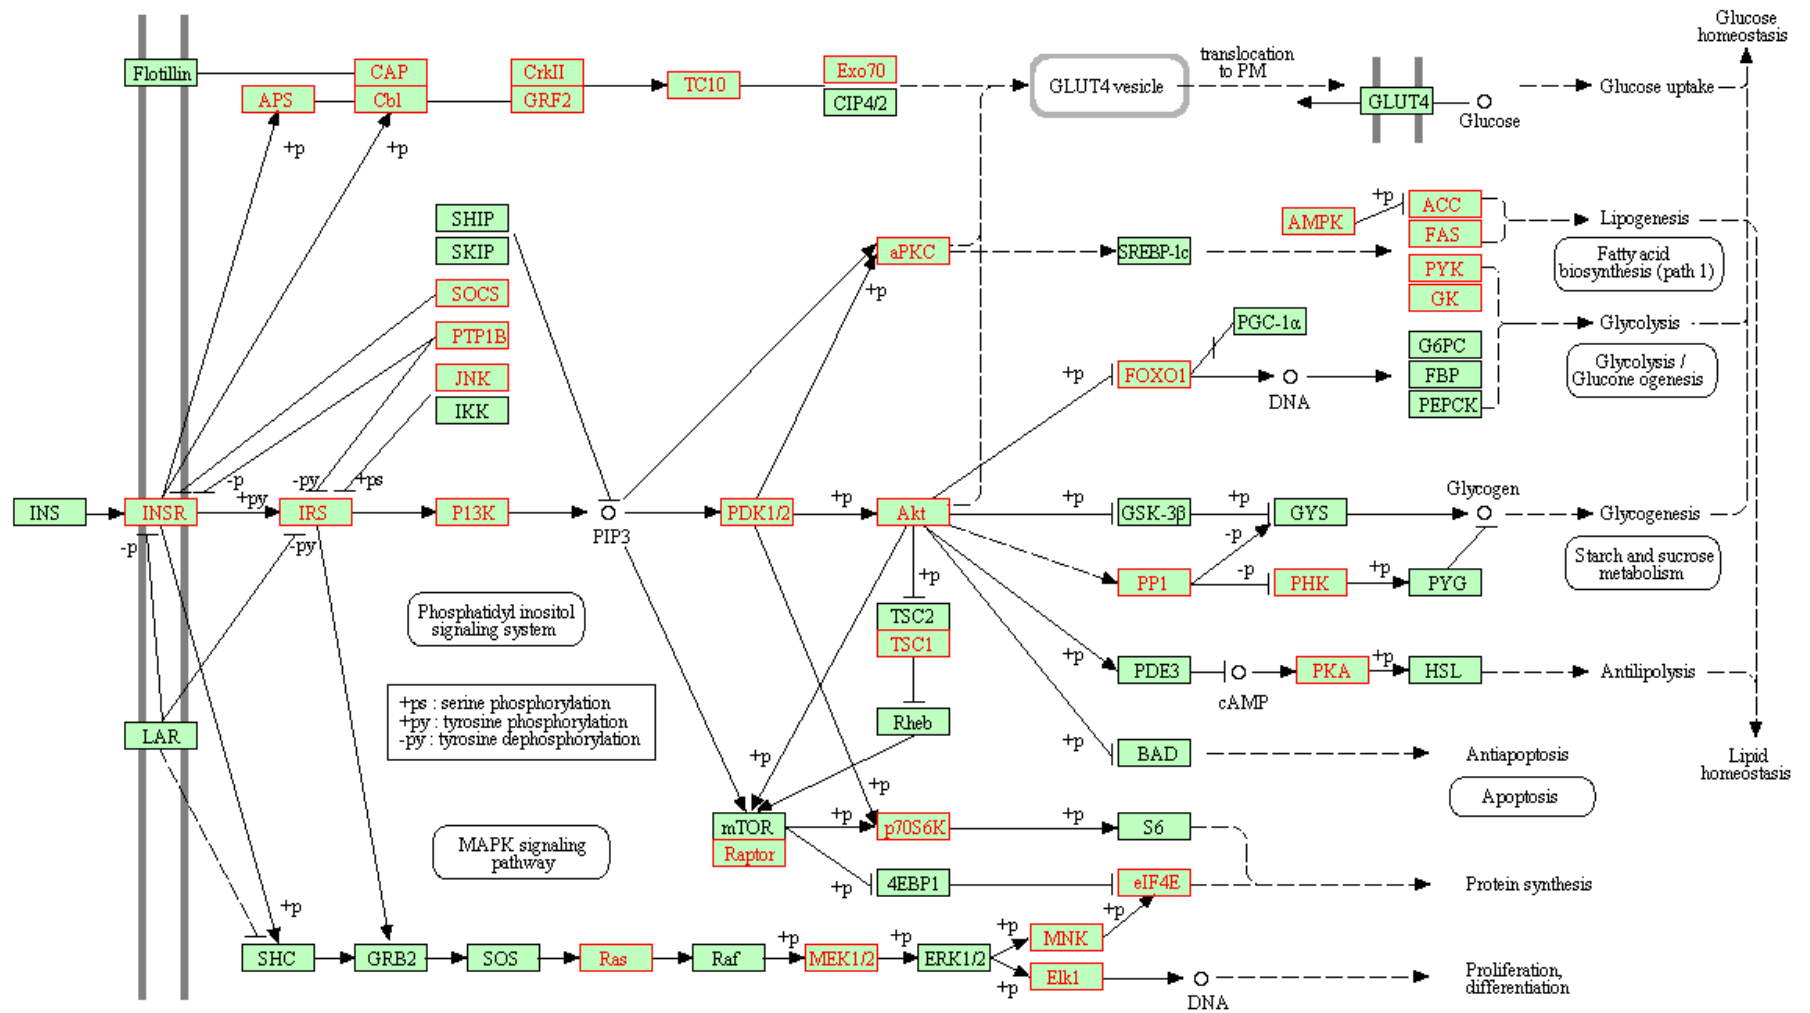

Supplement: pone.0040028.s001.pdf [file pone.0040028.s001.pdf]
